# Supplementary material for: Endophytic Bacterial Isolates From Halophytes Demonstrate Phytopathogen Biocontrol and Plant Growth Promotion Under High Salinity
Source: PubMed Central journal article supplement (PMC8129196; doi:10.3389/fmicb.2021.681567), 2021-05-04
Supplement: Data_Sheet_1.pdf [file Data_Sheet_1.pdf]

# **Culturable halophytic bacterial endophytome: a potential source of beneficial microbes for a sustainable agriculture**

*Christos A. Christakis<sup>1</sup>, Georgia Daskalogiannis<sup>2</sup>, Anastasia Chatzaki<sup>3</sup>, Emmanouil A. Markakis<sup>3</sup>, Glykeria Mermigka<sup>1</sup>, Angeliki Sagia<sup>2</sup>, Giulio Flavio Rizzo<sup>4</sup>, Vittoria Catara<sup>4</sup>, Ilias Lagkouvardos<sup>5</sup>, David J. Studholme<sup>6</sup>, Panagiotis F. Sarris<sup>1,2,6\*</sup>*

<sup>1</sup> Institute of Molecular Biology and Biotechnology, Foundation for Research and Technology - Hellas, Heraklion, Crete, Greece.

<sup>2</sup> Department of Biology, University of Crete, Voutes University Campus, Heraklion, Crete, Greece.

<sup>3</sup> Laboratory of Plant Pathology, Department of Viticulture, Vegetable Crops, Floriculture and Plant Protection, Hellenic Agricultural Organization DIMITRA, Heraklion, Crete, Greece.

<sup>4</sup> Dipartimento di Agricoltura, Alimentazione e Ambiente, Università degli studi di Catania, Catania, Italy.

<sup>5</sup> ZIEL - Institute for Food & Health, Technical University of Munich, Freising, Germany.

<sup>6</sup> Biosciences, University of Exeter, Exeter, Devon, United Kingdom.

**Supplementary Table S1.** Bacterial isolates from leaves and roots of *Matthiola tricuspidata*, *Crithmum maritimum* and *Cakile maritima* plants and *in vitro* salinity assays for salinity stress, phytopathogen growth inhibition and human pathogen growth inhibition.

**Supplementary\_Table\_S1\_In\_vitro\_assays.xlsx**

**Supplementary Table S2.** Analysis of variance for disease incidence (DI), final disease severity (FDS), mortality (M), relative area under disease progress curve (RAUDPC) and pathogen isolation ration (IR) for eggplants artificially inoculated with *V. dahliae* and treated with various bacterial strains and TRIANUM-P (CrR14, CrR18, CrR4, MTR12, MTR18, CM1, CM3, CM4, CM25 in *experiment I*, and MTR17a, MTR17d, MTR17f, MTR17g, MTR17h and MTR17b, MTR17c, TRIANUM-P in *experiment II*) or not (C-, V.d.).

|                         |                 | <i>F</i> values <sup>a</sup> |          |         |          |       |
|-------------------------|-----------------|------------------------------|----------|---------|----------|-------|
|                         |                 | Experiment I                 |          |         |          |       |
| Source                  | df <sup>b</sup> | DI                           | FDS      | M       | RAUDPC   | IR    |
| Replication             | 2               | 0.57                         | 0.02     | 0.50    | 0.67     | 1.82  |
| Treatment               | 10              | 362.38***                    | 96.82*** | 7.65*** | 31.57*** | 2.84* |
| Replication × Treatment | 20              | 0.57                         | 1.10     | 0.42    | 1.23     | 0.92  |
|                         |                 | Experiment II                |          |         |          |       |
| Source                  | df <sup>b</sup> | DI                           | FDS      | M       | RAUDPC   | IR    |
| Replication             | 2               | 0.72                         | 0.52     | 0.74    | 1.77     | 0.12  |
| Treatment               | 10              | 9.58***                      | 12.05*** | 3.27**  | 11.57*** | 2.83* |
| Replication × Treatment | 20              | 1.13                         | 1.09     | 1.20    | 1.19     | 0.71  |

<sup>a</sup> Symbols ‘\*’ and ‘\*\*\*’ indicate significance at  $P \leq 0.05$  and 0.001 levels, respectively, according to the *F* test

<sup>b</sup> degrees of freedom between groups

**Supplementary Table S3.** Analysis of variance for plant height, plant fresh weight and total number of leaves for eggplant artificially inoculated with *V. dahliae* and treated with various bacterial strains and TRIANUM-P (CrR14, CrR18, CrR4, MTR12, MTR18, CM1, CM3, CM4, CM25 in experiment I, and MTR17a, MTR17d, MTR17f, MTR17g, MTR17h, MTR17b, MTR17c, TRIANUM-P in *experiment II*) or not (C-, V.d.).

|                         |                       | <b>F values<sup>a</sup></b> |               |               |
|-------------------------|-----------------------|-----------------------------|---------------|---------------|
|                         |                       | <b>Experiment I</b>         |               |               |
| <b>Source</b>           | <b>df<sup>b</sup></b> | <b>Height</b>               | <b>Weight</b> | <b>Leaves</b> |
| Replication             | 2                     | 2.43                        | 1.12          | 1.65          |
| Treatment               | 10                    | 17.09***                    | 111.03***     | 12.23***      |
| Replication × Treatment | 20                    | 1.44                        | 0.47          | 1.34          |
|                         |                       | <b>Experiment II</b>        |               |               |
| <b>Source</b>           | <b>df<sup>b</sup></b> | <b>Height</b>               | <b>Weight</b> | <b>Leaves</b> |
| Replication             | 2                     | 1.58                        | 1.05          | 0.56          |
| Treatment               | 10                    | 3.26***                     | 12.60***      | 1.42          |
| Replication × Treatment | 20                    | 1.22                        | 1.21          | 0.87          |

<sup>a</sup> Symbol ‘\*\*\*’ indicates significance at  $P \leq 0.05$  and 0.001 levels, respectively, according to the *F* test

<sup>b</sup> degrees of freedom between groups.

**Supplementary Table S4.** Bacterial genome features in the categories of virulence, disease and defence for bacterial isolates CML04, CrR16, CrR07, CMR29, CrR06, CrR14 and CrR18.

| <b>Virulence, Disease and Defense</b>                                      | <i>Bacillus altitudinis</i><br>CML04 | <i>Bacillus haikouensis</i><br>CrR16 | <i>Enterobacter hormaechei</i><br>CrR07 | <i>Enterobacter</i><br>sp. CMR29 | <i>Glutamicibacter halophytocola</i><br>CrR06 | <i>Pseudomonas selenipraecipitans</i><br>CrR14 | <i>Sphingobacterium shayense</i><br>CrR18 |
|----------------------------------------------------------------------------|--------------------------------------|--------------------------------------|-----------------------------------------|----------------------------------|-----------------------------------------------|------------------------------------------------|-------------------------------------------|
| <b>Adhesion</b>                                                            | 0                                    | 0                                    | 4                                       | 5                                | 0                                             | 0                                              | 1                                         |
| Accessory colonization factor                                              | 0                                    | 0                                    | 0                                       | 0                                | 0                                             | 0                                              | 1                                         |
| Mediator of hyperadherence YidE in Enterobacteria and its conserved region | 0                                    | 0                                    | 4                                       | 5                                | 0                                             | 0                                              | 0                                         |
| <b>Bacteriocins, ribosomally synthesized antibacterial peptides</b>        | 10                                   | 10                                   | 0                                       | 0                                | 0                                             | 0                                              | 0                                         |
| Bacitracin Stress Response                                                 | 10                                   | 10                                   | 0                                       | 0                                | 0                                             | 0                                              | 0                                         |
| <b>Resistance to antibiotics and toxic compounds</b>                       | 23                                   | 37                                   | 30                                      | 27                               | 15                                            | 15                                             | 25                                        |
| MexC-MexD-OprJ Multidrug Efflux System                                     | 0                                    | 0                                    | 0                                       | 0                                | 0                                             | 1                                              | 0                                         |
| Streptothricin resistance                                                  | 1                                    | 0                                    | 1                                       | 1                                | 0                                             | 0                                              | 0                                         |
| Fosfomycin resistance                                                      | 0                                    | 1                                    | 1                                       | 3                                | 0                                             | 0                                              | 0                                         |
| Mercury reductase                                                          | 0                                    | 0                                    | 0                                       | 0                                | 2                                             | 0                                              | 0                                         |
| Copper homeostasis                                                         | 9                                    | 9                                    | 11                                      | 8                                | 3                                             | 2                                              | 10                                        |
| Cobalt-zinc-cadmium resistance                                             | 6                                    | 11                                   | 4                                       | 2                                | 4                                             | 5                                              | 4                                         |
| Resistance to fluoroquinolones                                             | 3                                    | 3                                    | 2                                       | 3                                | 0                                             | 1                                              | 2                                         |
| Aminoglycoside adenylyltransferases                                        | 1                                    | 0                                    | 0                                       | 0                                | 0                                             | 0                                              | 0                                         |
| Copper homeostasis: copper tolerance                                       | 1                                    | 1                                    | 9                                       | 10                               | 0                                             | 2                                              | 1                                         |

|                                                                                       |           |           |           |           |           |           |           |
|---------------------------------------------------------------------------------------|-----------|-----------|-----------|-----------|-----------|-----------|-----------|
| Beta-lactamase                                                                        | 0         | 5         | 1         | 1         | 1         | 1         | 3         |
| Mercuric reductase                                                                    | 1         | 0         | 0         |           | 0         | 0         | 2         |
| Mercury resistance operon                                                             | 0         | 0         | 0         | 0         | 0         | 0         | 1         |
| Multidrug Resistance Efflux Pumps                                                     | 2         | 5         | 0         |           | 2         | 2         | 0         |
| Adaptation to d-cysteine                                                              | 0         | 0         | 1         | 1         | 0         | 0         | 0         |
| Resistance to chromium compounds                                                      | 0         | 1         | 0         |           | 1         | 1         | 1         |
| Bile hydrolysis                                                                       | 0         | 0         | 0         | 0         | 0         | 0         | 1         |
| <b>Invasion and intracellular resistance</b>                                          | <b>25</b> | <b>15</b> | <b>16</b> | <b>18</b> | <b>13</b> | <b>17</b> | <b>14</b> |
| Mycobacterium virulence operon involved in protein synthesis (SSU ribosomal proteins) | 9         | 5         | 7         | 9         | 4         | 9         | 6         |
| Mycobacterium virulence operon involved in DNA transcription                          | 9         | 4         | 3         | 2         | 3         | 2         | 2         |
| Mycobacterium virulence operon possibly involved in quinolinate biosynthesis          | 3         | 3         | 3         | 4         | 3         | 3         | 3         |
| Mycobacterium virulence operon involved in protein synthesis (LSU ribosomal proteins) | 4         | 3         | 3         | 3         | 3         | 3         | 3         |
| <b>Bacteriocins, ribosomally synthesized antibacterial peptides</b>                   | <b>0</b>  | <b>0</b>  | <b>1</b>  | <b>1</b>  | <b>0</b>  | <b>1</b>  | <b>1</b>  |
| Tolerance to colicin E2                                                               | 0         | 0         | 1         | 1         | 0         | 1         | 1         |
| <b>Membrane Transport</b>                                                             | <b>0</b>  | <b>13</b> | <b>49</b> | <b>50</b> | <b>6</b>  | <b>30</b> | <b>3</b>  |
| Protein secretion system, Type II (Widespread colonization island)                    | 0         | 0         | 0         | 0         | 3         | 0         | 0         |

|                                                                                             |   |    |    |    |   |    |   |
|---------------------------------------------------------------------------------------------|---|----|----|----|---|----|---|
| Protein secretion system, Type II (General Secretion Pathway)                               | 0 | 0  | 0  | 0  | 0 | 0  | 0 |
| Protein secretion system, Type V (Two partner secretion pathway - TPS)                      | 0 | 0  | 0  | 0  | 0 | 0  | 0 |
| Protein secretion system, Type I                                                            | 0 | 0  | 11 | 10 | 0 | 0  | 0 |
| Protein secretion system, Type III                                                          | 0 | 0  | 0  | 0  | 0 | 0  | 0 |
| Protein secretion system, Type VI                                                           | 0 | 0  | 0  | 0  | 0 | 0  | 0 |
| Protein and nucleoprotein secretion system, Type IV (Type IV pilus)                         | 0 | 11 | 15 | 17 | 0 | 24 | 0 |
| Protein and nucleoprotein secretion system, Type IV (Conjugative transfer)                  | 0 | 0  | 0  | 0  | 0 | 0  | 0 |
| Protein secretion system, Type VII (Chaperone/Usher pathway, CU; sigma-Fimbriae)            | 0 | 0  | 5  | 5  | 0 | 0  | 0 |
| Protein secretion system, Type VII (Type 1 pili_mannose-sensitive fimbriae, gamma-fimbriae) | 0 | 0  | 5  | 6  | 0 | 0  | 0 |
| Twin-arginine translocation system                                                          | / | 2  | 5  | 5  | 3 | 6  | 3 |
| Protein secretion system, Type VIII (Extracellular nucleation/precipitation pathway, ENP)   | 0 | 0  | 8  | 7  | 0 | 0  | 0 |

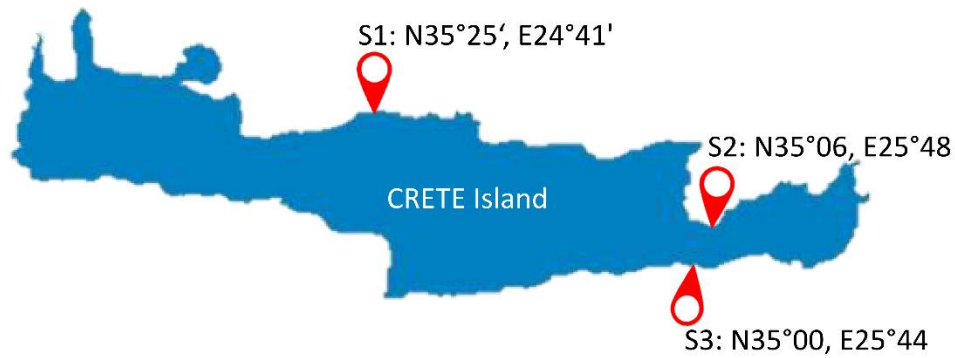

**Supplementary Figure S1.** Collection points and coordinates of plant samples on Crete island.

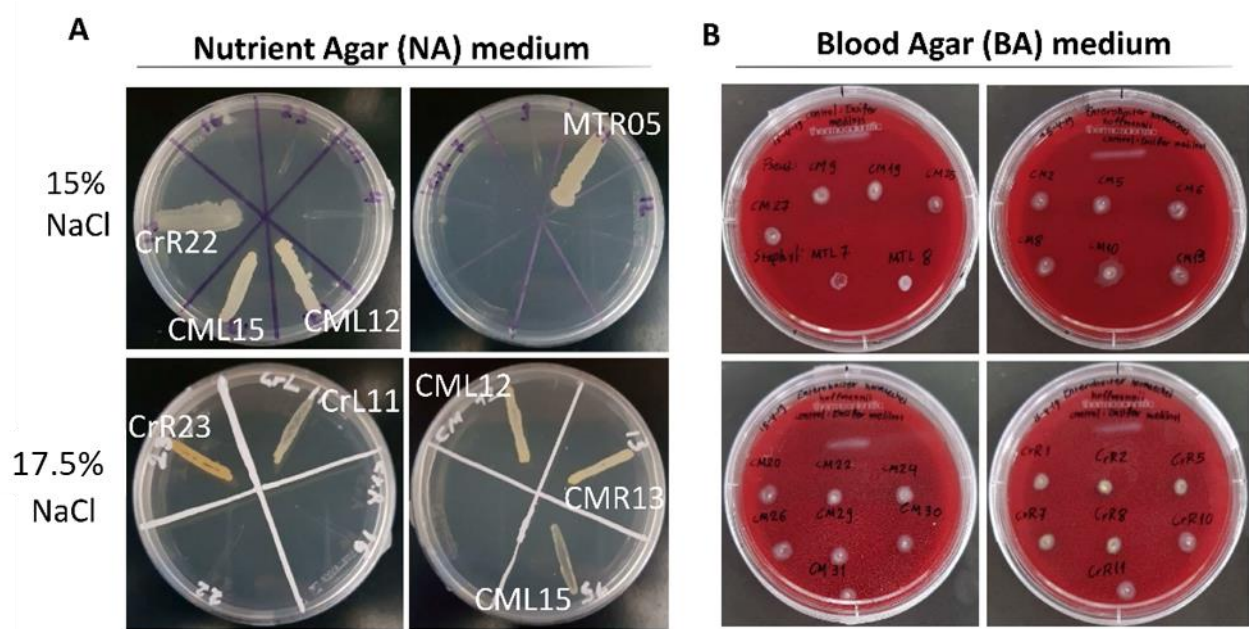

**Supplementary Figure S2. A.** Representative halophilic bacterial isolates cultivated in 15% and 17.5% NaCl. **B.** Haemolysis assay for the isolates that belong to opportunistic human pathogen species. Strains checked for haemolysis: CrR01; CrR02; CrR05; CrR07; CrR08; CrR10; CrR11; CMR02; CMR05; CMR06; CMR08; CMR10; CMR13; CMR20; CMR22; CMR24; CMR26; CMR29; CMR30; CMR31; CMR09; CMR19; CMR25; CMR27; MTL07; MTL08.

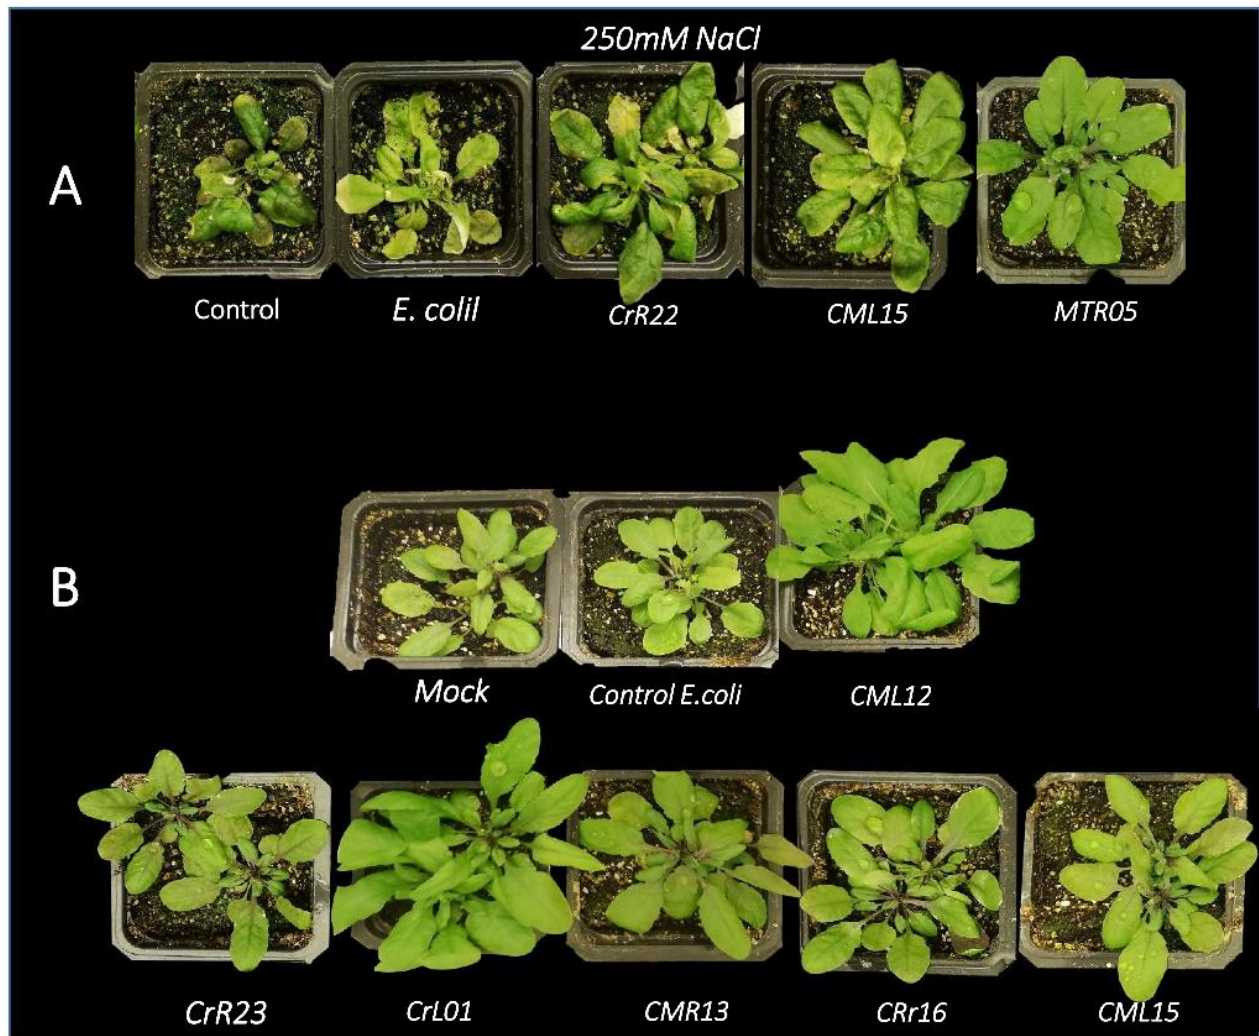

**Supplementary Figure S3.** Representative plants of the salt tolerance assays (**A**) and the plant growth promoting assays (**B**).



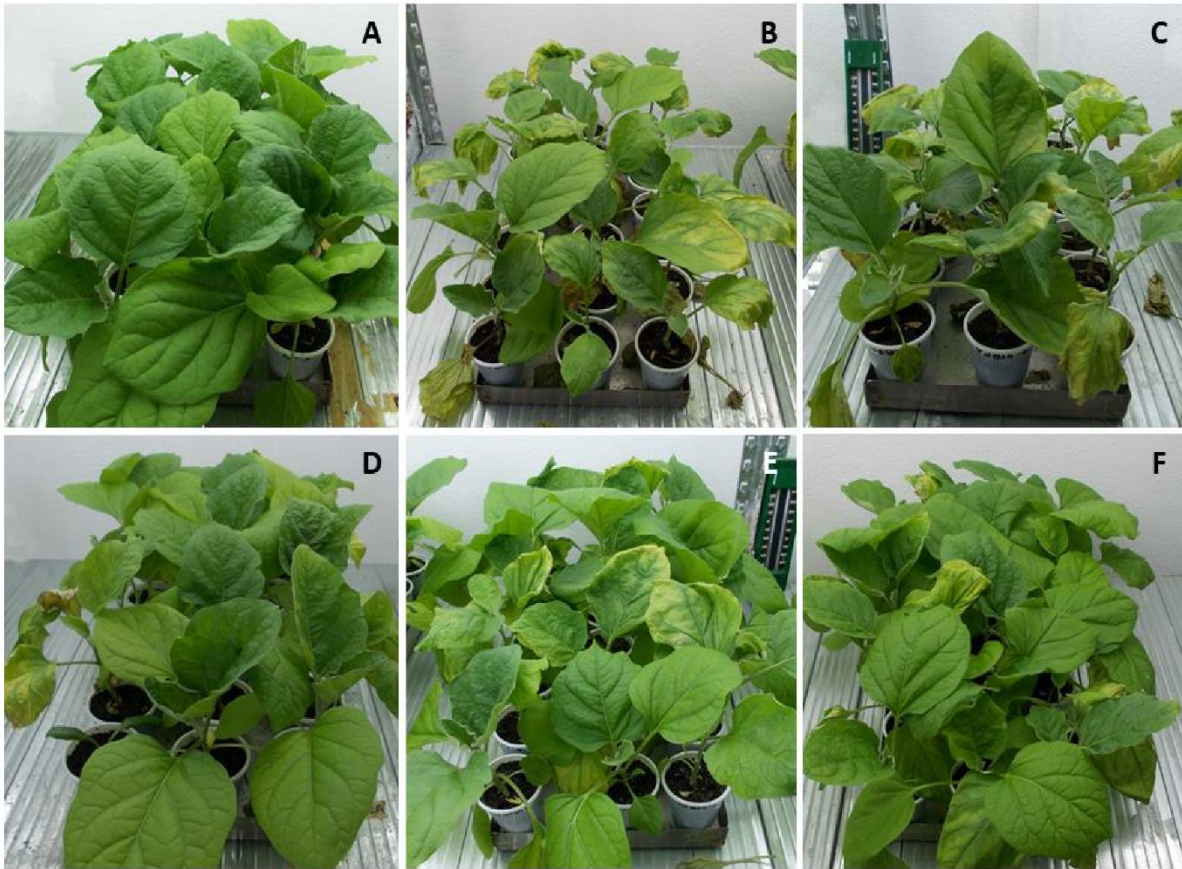

**Figure S4.** *Verticillium* wilt symptoms on eggplants treated with various bacterial strains and the commercial biofungicide TRIANUM-P (Koppert B.V. Hellas). **A:** mock inoculated plants treated with water (negative controls); **B:** *Verticillium dahliae*-inoculated plants with no other treatment (positive controls), **C:** *V. dahliae*-inoculated plants treated with the non-suppressive bacterial strain Mtr17d; **D** and **E:** *V. dahliae*-inoculated plants treated with the disease-suppressive strains Mtr17h and Mtr17c, respectively; **F:** *V. dahliae*-inoculated plants treated with the disease-suppressive biofungicide TRIANUM-P.

**Supplementary Figure S5.** Subsystem feature counts, category distribution and subsystem coverage of the gene content of fully sequenced bacterial isolates.

***Pseudomonas seleniipraecipitans* CrR14**

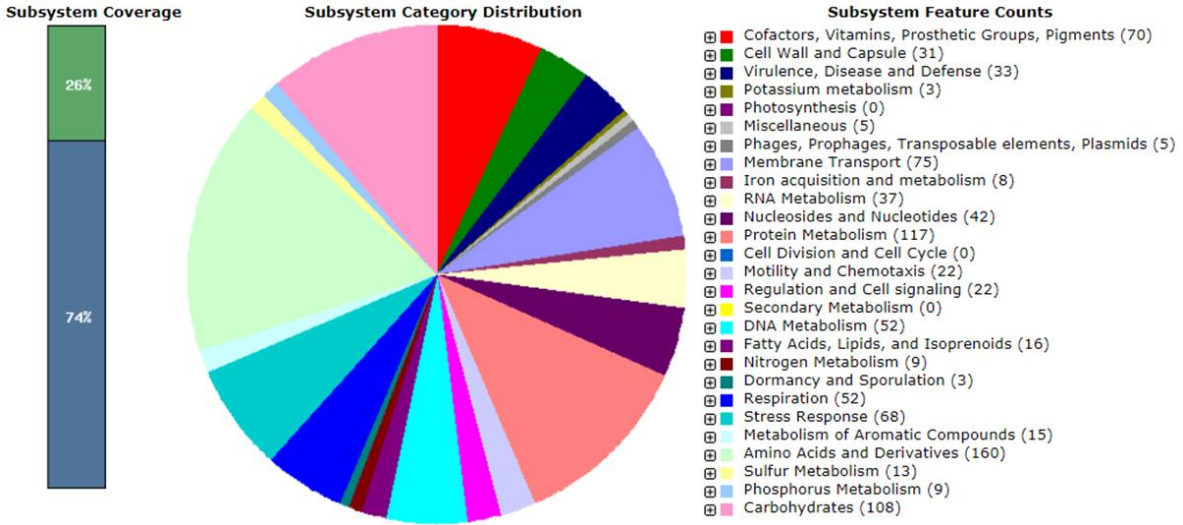

***Bacillus alitudinis* CML04**

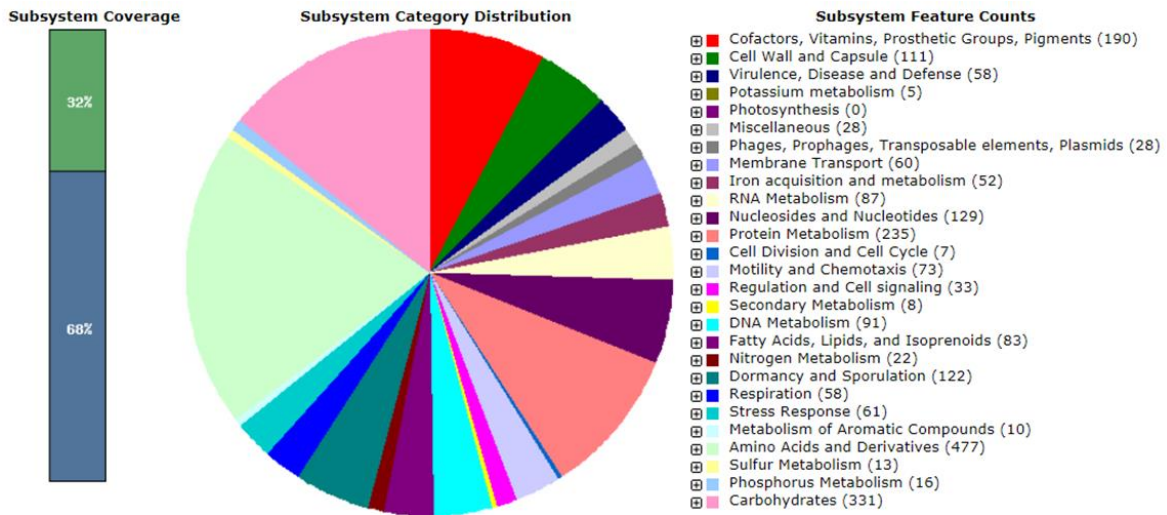

## *Bacillus haikouensis* CrR16

Subsystem Coverage

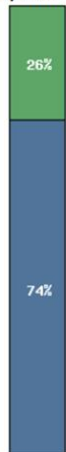

Subsystem Category Distribution

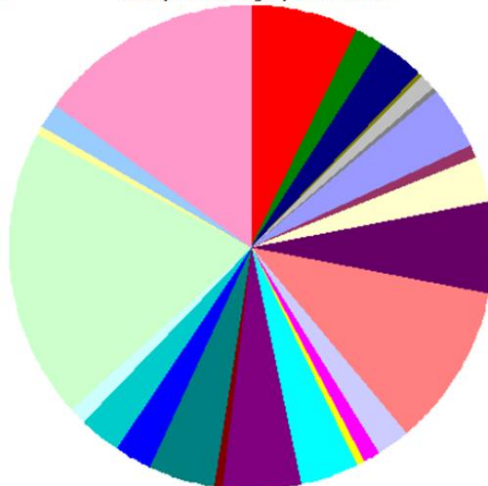

Subsystem Feature Counts

- ☐ Cofactors, Vitamins, Prosthetic Groups, Pigments (151)
- ☐ Cell Wall and Capsule (42)
- ☐ Virulence, Disease and Defense (62)
- ☐ Potassium metabolism (8)
- ☐ Photosynthesis (0)
- ☐ Miscellaneous (19)
- ☐ Phages, Prophages, Transposable elements, Plasmids (10)
- ☐ Membrane Transport (85)
- ☐ Iron acquisition and metabolism (15)
- ☐ RNA Metabolism (65)
- ☐ Nucleosides and Nucleotides (126)
- ☐ Protein Metabolism (224)
- ☐ Cell Division and Cell Cycle (4)
- ☐ Motility and Chemotaxis (43)
- ☐ Regulation and Cell signaling (25)
- ☐ Secondary Metabolism (12)
- ☐ DNA Metabolism (80)
- ☐ Fatty Acids, Lipids, and Isoprenoids (108)
- ☐ Nitrogen Metabolism (11)
- ☐ Dormancy and Sporulation (93)
- ☐ Respiration (52)
- ☐ Stress Response (55)
- ☐ Metabolism of Aromatic Compounds (22)
- ☐ Amino Acids and Derivatives (403)
- ☐ Sulfur Metabolism (13)
- ☐ Phosphorus Metabolism (31)
- ☐ Carbohydrates (303)

## *Enterobacter hormaechei* CrR07

Subsystem Coverage

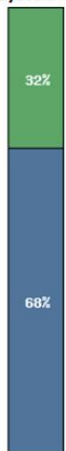

Subsystem Category Distribution

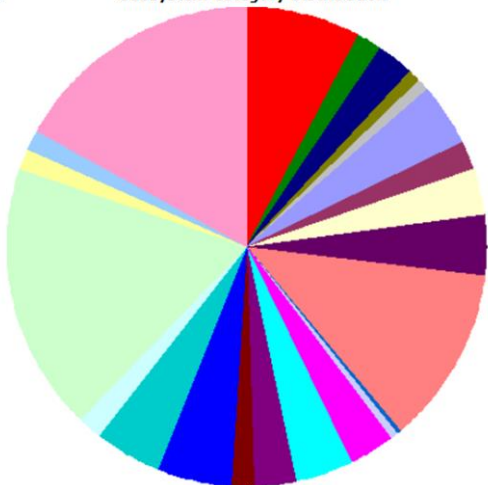

Subsystem Feature Counts

- ☐ Cofactors, Vitamins, Prosthetic Groups, Pigments (166)
- ☐ Cell Wall and Capsule (35)
- ☐ Virulence, Disease and Defense (51)
- ☐ Potassium metabolism (19)
- ☐ Photosynthesis (0)
- ☐ Miscellaneous (18)
- ☐ Phages, Prophages, Transposable elements, Plasmids (4)
- ☐ Membrane Transport (86)
- ☐ Iron acquisition and metabolism (43)
- ☐ RNA Metabolism (62)
- ☐ Nucleosides and Nucleotides (90)
- ☐ Protein Metabolism (247)
- ☐ Cell Division and Cell Cycle (7)
- ☐ Motility and Chemotaxis (15)
- ☐ Regulation and Cell signaling (61)
- ☐ Secondary Metabolism (5)
- ☐ DNA Metabolism (83)
- ☐ Fatty Acids, Lipids, and Isoprenoids (55)
- ☐ Nitrogen Metabolism (36)
- ☐ Dormancy and Sporulation (1)
- ☐ Respiration (104)
- ☐ Stress Response (97)
- ☐ Metabolism of Aromatic Compounds (34)
- ☐ Amino Acids and Derivatives (379)
- ☐ Sulfur Metabolism (29)
- ☐ Phosphorus Metabolism (29)
- ☐ Carbohydrates (343)

## *Enterobacter* sp. CMR29

Subsystem Coverage

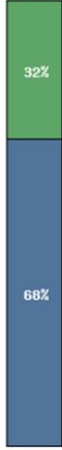

Subsystem Category Distribution

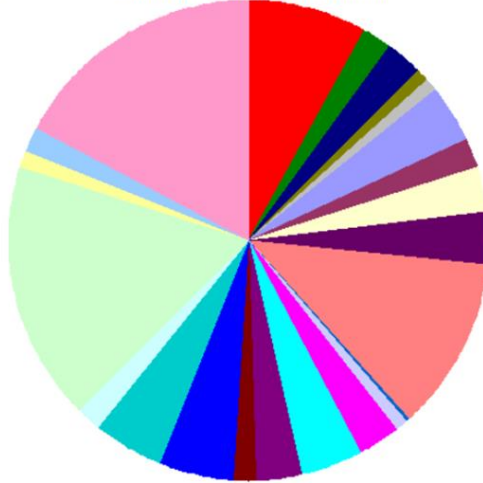

Subsystem Feature Counts

|   |                                                        |
|---|--------------------------------------------------------|
| ■ | Cofactors, Vitamins, Prosthetic Groups, Pigments (171) |
| ■ | Cell Wall and Capsule (41)                             |
| ■ | Virulence, Disease and Defense (51)                    |
| ■ | Potassium metabolism (17)                              |
| ■ | Photosynthesis (0)                                     |
| ■ | Miscellaneous (19)                                     |
| ■ | Phages, Prophages, Transposable elements, Plasmids (3) |
| ■ | Membrane Transport (78)                                |
| ■ | Iron acquisition and metabolism (40)                   |
| ■ | RNA Metabolism (61)                                    |
| ■ | Nucleosides and Nucleotides (80)                       |
| ■ | Protein Metabolism (240)                               |
| ■ | Cell Division and Cell Cycle (7)                       |
| ■ | Motility and Chemotaxis (15)                           |
| ■ | Regulation and Cell signaling (59)                     |
| ■ | Secondary Metabolism (5)                               |
| ■ | DNA Metabolism (85)                                    |
| ■ | Fatty Acids, Lipids, and Isoprenoids (61)              |
| ■ | Nitrogen Metabolism (37)                               |
| ■ | Dormancy and Sporulation (1)                           |
| ■ | Respiration (105)                                      |
| ■ | Stress Response (98)                                   |
| ■ | Metabolism of Aromatic Compounds (34)                  |
| ■ | Amino Acids and Derivatives (363)                      |
| ■ | Sulfur Metabolism (24)                                 |
| ■ | Phosphorus Metabolism (33)                             |
| ■ | Carbohydrates (344)                                    |

## *Glutamicibacter halophytocola* CrR06

Subsystem Coverage

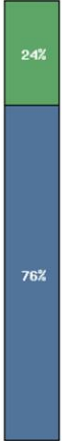

Subsystem Category Distribution

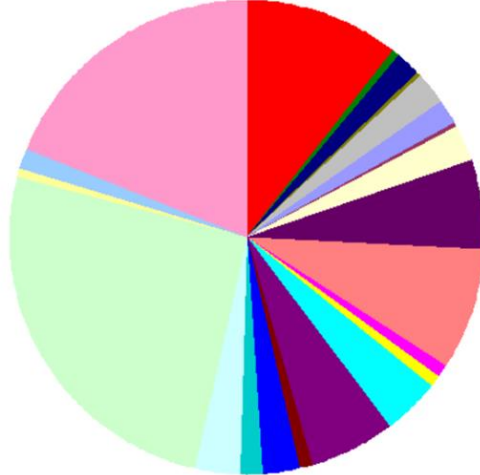

Subsystem Feature Counts

|   |                                                        |
|---|--------------------------------------------------------|
| ■ | Cofactors, Vitamins, Prosthetic Groups, Pigments (175) |
| ■ | Cell Wall and Capsule (9)                              |
| ■ | Virulence, Disease and Defense (28)                    |
| ■ | Potassium metabolism (5)                               |
| ■ | Photosynthesis (0)                                     |
| ■ | Miscellaneous (34)                                     |
| ■ | Phages, Prophages, Transposable elements, Plasmids (2) |
| ■ | Membrane Transport (27)                                |
| ■ | Iron acquisition and metabolism (8)                    |
| ■ | RNA Metabolism (39)                                    |
| ■ | Nucleosides and Nucleotides (100)                      |
| ■ | Protein Metabolism (137)                               |
| ■ | Cell Division and Cell Cycle (0)                       |
| ■ | Motility and Chemotaxis (0)                            |
| ■ | Regulation and Cell signaling (13)                     |
| ■ | Secondary Metabolism (12)                              |
| ■ | DNA Metabolism (64)                                    |
| ■ | Fatty Acids, Lipids, and Isoprenoids (98)              |
| ■ | Nitrogen Metabolism (12)                               |
| ■ | Dormancy and Sporulation (1)                           |
| ■ | Respiration (41)                                       |
| ■ | Stress Response (28)                                   |
| ■ | Metabolism of Aromatic Compounds (51)                  |
| ■ | Amino Acids and Derivatives (418)                      |
| ■ | Sulfur Metabolism (8)                                  |
| ■ | Phosphorus Metabolism (22)                             |
| ■ | Carbohydrates (304)                                    |

## *Spingobacterium shayense* CrR18

Subsystem Coverage

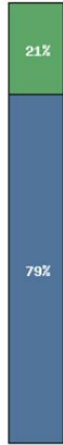

Subsystem Category Distribution

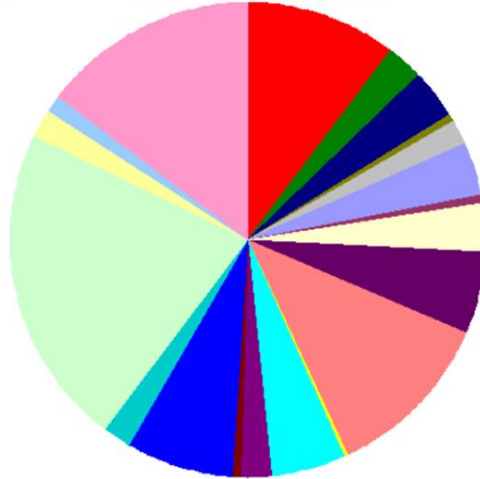

Subsystem Feature Counts

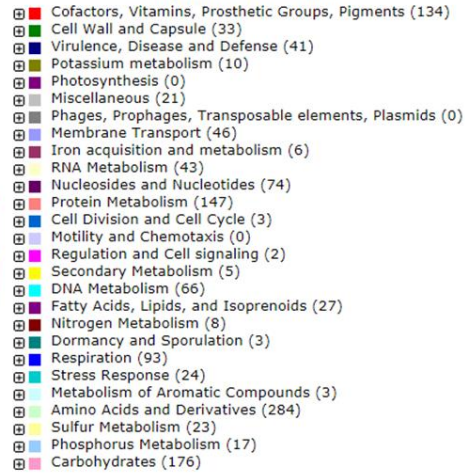

## *Arthrobacter* sp. CMR16

Subsystem Coverage

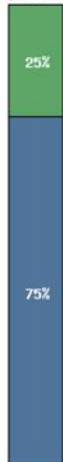

Subsystem Category Distribution

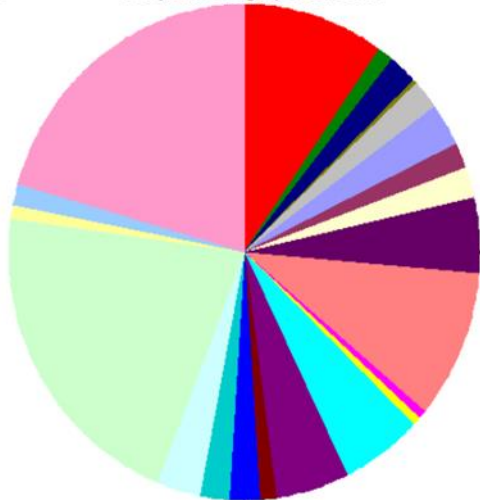

Subsystem Feature Counts

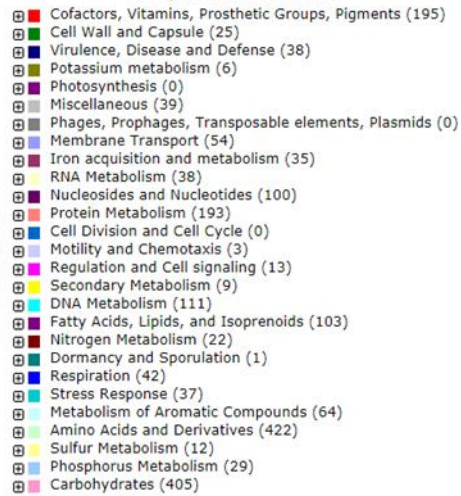

## *Pseudomonas* sp. CrR25

Subsystem Coverage

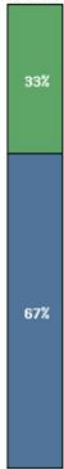

Subsystem Category Distribution

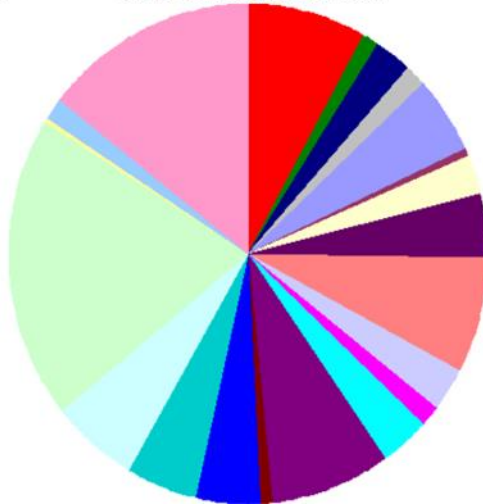

Subsystem Feature Counts

|   |                                                        |
|---|--------------------------------------------------------|
| ☐ | Cofactors, Vitamins, Prosthetic Groups, Pigments (276) |
| ☐ | Cell Wall and Capsule (39)                             |
| ☐ | Virulence, Disease and Defense (79)                    |
| ☐ | Potassium metabolism (5)                               |
| ☐ | Photosynthesis (0)                                     |
| ☐ | Miscellaneous (43)                                     |
| ☐ | Phages, Prophages, Transposable elements, Plasmids (5) |
| ☐ | Membrane Transport (173)                               |
| ☐ | Iron acquisition and metabolism (15)                   |
| ☐ | RNA Metabolism (85)                                    |
| ☐ | Nucleosides and Nucleotides (138)                      |
| ☐ | Protein Metabolism (253)                               |
| ☐ | Cell Division and Cell Cycle (0)                       |
| ☐ | Motility and Chemotaxis (91)                           |
| ☐ | Regulation and Cell signaling (48)                     |
| ☐ | Secondary Metabolism (7)                               |
| ☐ | DNA Metabolism (112)                                   |
| ☐ | Fatty Acids, Lipids, and Isoprenoids (268)             |
| ☐ | Nitrogen Metabolism (28)                               |
| ☐ | Dormancy and Sporulation (5)                           |
| ☐ | Respiration (145)                                      |
| ☐ | Stress Response (159)                                  |
| ☐ | Metabolism of Aromatic Compounds (189)                 |
| ☐ | Amino Acids and Derivatives (664)                      |
| ☐ | Sulfur Metabolism (12)                                 |
| ☐ | Phosphorus Metabolism (40)                             |
| ☐ | Carbohydrates (457)                                    |

## *Pseudomonas* sp. CMR27

Subsystem Coverage

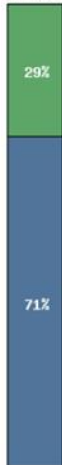

Subsystem Category Distribution

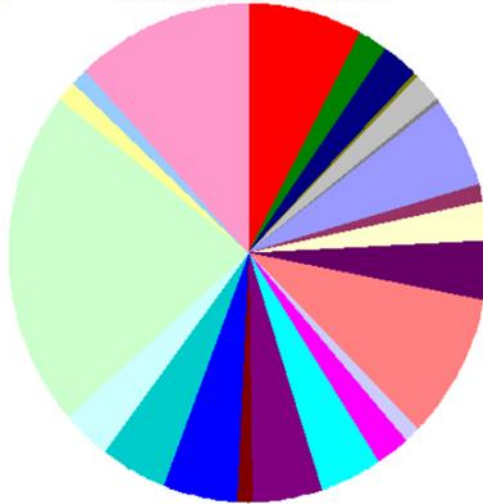

Subsystem Feature Counts

|   |                                                        |
|---|--------------------------------------------------------|
| ☐ | Cofactors, Vitamins, Prosthetic Groups, Pigments (201) |
| ☐ | Cell Wall and Capsule (52)                             |
| ☐ | Virulence, Disease and Defense (58)                    |
| ☐ | Potassium metabolism (13)                              |
| ☐ | Photosynthesis (0)                                     |
| ☐ | Miscellaneous (48)                                     |
| ☐ | Phages, Prophages, Transposable elements, Plasmids (9) |
| ☐ | Membrane Transport (145)                               |
| ☐ | Iron acquisition and metabolism (30)                   |
| ☐ | RNA Metabolism (60)                                    |
| ☐ | Nucleosides and Nucleotides (101)                      |
| ☐ | Protein Metabolism (238)                               |
| ☐ | Cell Division and Cell Cycle (0)                       |
| ☐ | Motility and Chemotaxis (30)                           |
| ☐ | Regulation and Cell signaling (55)                     |
| ☐ | Secondary Metabolism (5)                               |
| ☐ | DNA Metabolism (106)                                   |
| ☐ | Fatty Acids, Lipids, and Isoprenoids (125)             |
| ☐ | Nitrogen Metabolism (22)                               |
| ☐ | Dormancy and Sporulation (2)                           |
| ☐ | Respiration (132)                                      |
| ☐ | Stress Response (112)                                  |
| ☐ | Metabolism of Aromatic Compounds (87)                  |
| ☐ | Amino Acids and Derivatives (557)                      |
| ☐ | Sulfur Metabolism (36)                                 |
| ☐ | Phosphorus Metabolism (28)                             |
| ☐ | Carbohydrates (291)                                    |

# *Pseudomonas* sp. CMR25

Subsystem Coverage

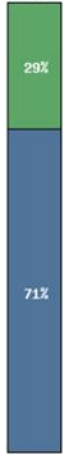

Subsystem Category Distribution

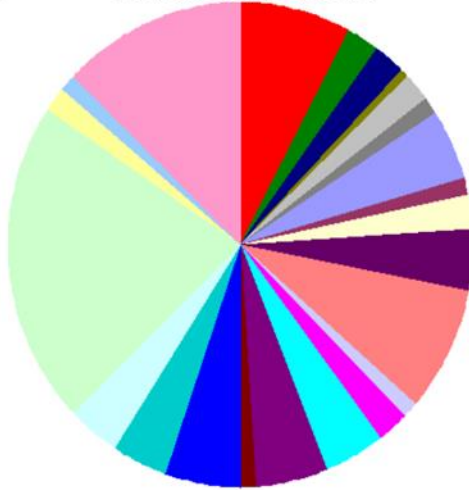

Subsystem Feature Counts

- ☐ Cofactors, Vitamins, Prosthetic Groups, Pigments (217)
- ☐ Cell Wall and Capsule (64)
- ☐ Virulence, Disease and Defense (64)
- ☐ Potassium metabolism (11)
- ☐ Photosynthesis (0)
- ☐ Miscellaneous (57)
- ☐ Phages, Prophages, Transposable elements, Plasmids (28)
- ☐ Membrane Transport (135)
- ☐ Iron acquisition and metabolism (29)
- ☐ RNA Metabolism (62)
- ☐ Nucleosides and Nucleotides (114)
- ☐ Protein Metabolism (234)
- ☐ Cell Division and Cell Cycle (0)
- ☐ Motility and Chemotaxis (31)
- ☐ Regulation and Cell signaling (57)
- ☐ Secondary Metabolism (5)
- ☐ DNA Metabolism (120)
- ☐ Fatty Acids, Lipids, and Isoprenoids (139)
- ☐ Nitrogen Metabolism (30)
- ☐ Dormancy and Sporulation (2)
- ☐ Respiration (142)
- ☐ Stress Response (111)
- ☐ Metabolism of Aromatic Compounds (101)
- ☐ Amino Acids and Derivatives (602)
- ☐ Sulfur Metabolism (45)
- ☐ Phosphorus Metabolism (29)
- ☐ Carbohydrates (346)
